# Supplementary material
Source: publisher figshare collection journal article supplement (https://tandf.figshare.com/ndownloader/files/16716629)
Supplement: Supplementary file 1 [file 16716629]

JCGS-17-353 code:

A beta version of the R package for the Pliable Lasso JCGS-17-353 is available at

<https://statweb.stanford.edu/~tibs/pliable/>
